# Supplementary material for: Supraglacial lake bathymetry automatically derived from ICESat-2 constraining lake depth estimates from multi-source satellite imagery
Source: Copernicus journal article supplement (doi:10.5194/tc-15-5115-2021), 2021-11-12
Supplement: Supplementary file 1 [file tc-15-5115-2021-supplement.pdf]

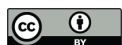

*Supplement of*

**Supraglacial lake bathymetry automatically derived  
from ICESat-2 constraining lake depth estimates  
from multi-source satellite imagery**

**Rajashree Tri Datta and Bert Wouters**

*Correspondence to:* Rajashree Tri Datta ([tri.datta@gmail.com](mailto:tri.datta@gmail.com))

The copyright of individual parts of the supplement might differ from the article licence.

## Supplemental Tables and Figures.

## Lakes Over Sermeq Kujalleq

| Designation                                                                                        | Ground track/spot | Min/Max Lat            | Min/Max Lon              | Max Lake Surface Area from imagery (m <sup>2</sup> ) | ICESat-2 track length (m) | ICESat-2 track Max depth |
|----------------------------------------------------------------------------------------------------|-------------------|------------------------|--------------------------|------------------------------------------------------|---------------------------|--------------------------|
| <b>RGT 727 May 15<sup>th</sup>, 2019</b>                                                           |                   |                        |                          |                                                      |                           |                          |
| Landsat: LC08_L1TP_009011_20190514_20190521                                                        |                   |                        |                          |                                                      |                           |                          |
| 1 Lake Julian<br>Coincide with OIB                                                                 | gt1l              | 68.707455<br>68.712048 | -49.847328<br>-49.845716 | 160800                                               | 2754.44                   | 3.95                     |
| Sentinel: T22WEB_20190512T151809 T22WEB_20190514T150921                                            |                   |                        |                          |                                                      |                           |                          |
| <b>RGT 841 May 23<sup>rd</sup></b>                                                                 |                   |                        |                          |                                                      |                           |                          |
| Landsat: LC08_L1TP_010011_20190521_20190604_01_T1                                                  |                   |                        |                          |                                                      |                           |                          |
| Sentinel: T22WEB_20190520T152911 T22WEB_20190525T152819                                            |                   |                        |                          |                                                      |                           |                          |
| 1                                                                                                  | gt1l_             | 68.616957<br>68.618372 | -50.028838<br>-50.028284 | 357900                                               | 2398.82                   | 1.31                     |
| PlanetScope: 2386345_2270816_2019-05-23_1035_BGRN_SR                                               |                   |                        |                          |                                                      |                           |                          |
| SkySat: 20190522_180624_ssc6d1_0087_analytic                                                       |                   |                        |                          |                                                      |                           |                          |
| 2 Lake Ayse                                                                                        | gt1l              | 68.647653<br>68.655258 | -50.041117<br>-50.038496 | 880300                                               | 3092.19                   | 4.50                     |
| PlanetScope:<br>2386345_2270816_2019-05-23_1035_BGRN_SR<br>2389698_2270816_2019-05-24_1002_BGRN_SR |                   |                        |                          |                                                      |                           |                          |
| SkySat:<br>20190522_180624_ssc6d1_0082_analytic<br>20190522_180624_ssc6d1_0083_analytic            |                   |                        |                          |                                                      |                           |                          |
| 3                                                                                                  | gt1r              | 68.563169<br>68.568040 | -50.009826<br>-50.008147 | 804873                                               | 2786.51                   | 3.03                     |
| SkySat:<br>20190522_180624_ssc6d1_0092_analytic<br>20190522_180624_ssc6d1_0093_analytic            |                   |                        |                          |                                                      |                           |                          |

|                                                                                                                                         |      |                        |                          |        |         |      |
|-----------------------------------------------------------------------------------------------------------------------------------------|------|------------------------|--------------------------|--------|---------|------|
| 4                                                                                                                                       | gt1r | 68.646358<br>68.656471 | -50.039232<br>-50.035775 | 880300 | 3372.80 | 4.82 |
| PlanetScope:<br>2386345_2270816_2019-05-23_1035_BGRN_SR<br>2389698_2270816_2019-05-24_1002_BGRN_SR                                      |      |                        |                          |        |         |      |
| SkySat:<br>20190522_180624_ssc6d1_0082_analytic<br>20190522_180624_ssc6d1_0083_analytic<br>20190522_180624_ssc6d1_0084_analytic         |      |                        |                          |        |         |      |
| 5                                                                                                                                       | gt3l | 68.805579<br>68.808883 | -49.931074<br>-49.929887 | 625127 | 2608.30 | 1.81 |
| PlanetScope:<br>20190523_143311_1035_3B_AnalyticMS_SR<br>20190524_115042_0f46_3B_AnalyticMS_SR<br>20190524_115043_0f46_3B_AnalyticMS_SR |      |                        |                          |        |         |      |
| SkySat:<br>20190522_180624_ssc6d1_0067_analytic                                                                                         |      |                        |                          |        |         |      |
| <b>RGT 1108 June 9<sup>th</sup>, 2019</b>                                                                                               |      |                        |                          |        |         |      |
| Landsat: LC08_L1TP_008012_20190608_20190619_01_T1                                                                                       |      |                        |                          |        |         |      |
| 1                                                                                                                                       | gt1l | 68.521802<br>68.531710 | -48.870196<br>-48.866903 | 574200 | 3350.97 | 2.99 |
| 2                                                                                                                                       | gt1r | 68.521989<br>68.529861 | -48.872277<br>-48.869664 | 574200 | 3123.05 | 1.51 |
| SkySat:<br>20190608_152016_ssc2d3_0080_analytic<br>20190608_152016_ssc2d3_0081_analytic                                                 |      |                        |                          |        |         |      |
| 3                                                                                                                                       | gt2l | 68.729626<br>68.736651 | -48.881484<br>-48.879153 | 596931 | 3026.49 | 2.99 |
| SkySat:<br>20190608_152016_ssc2d3_0080_analytic<br>20190608_152016_ssc2d3_0081_analytic                                                 |      |                        |                          |        |         |      |
| 4                                                                                                                                       | gt2l | 68.845743<br>68.855759 | -48.842804<br>-48.839477 | 956190 | 3360.29 | 2.18 |
| SkySat:<br>20190608_152016_ssc2d3_0066_analytic<br>20190608_152016_ssc2d3_0067_analytic                                                 |      |                        |                          |        |         |      |

|                                                                                         |       |                        |                          |         |         |      |
|-----------------------------------------------------------------------------------------|-------|------------------------|--------------------------|---------|---------|------|
| 5                                                                                       | gt3l  | 68.587228<br>68.591745 | -49.008428<br>-49.006958 | 772089  | 2746.55 | 1.95 |
| SkySat:<br>20190608_152016_ssc2d2_0093_analytic<br>20190608_152016_ssc2d2_0094_analytic |       |                        |                          |         |         |      |
| 6                                                                                       | gt3l  | 68.562104<br>68.565898 | -49.016567<br>-49.015336 | 54167   | 2665.72 | 1.51 |
| SkySat:<br>20190608_152016_ssc2d2_0096_analytic<br>20190608_152016_ssc2d2_0097_analytic |       |                        |                          |         |         |      |
| 7                                                                                       | gt3l  | 68.658882<br>68.667144 | -48.985110<br>-48.982403 | 987300  | 3165.52 | 3.04 |
| SkySat:<br>20190608_152016_ssc2d2_0085_analytic<br>20190608_152016_ssc2d2_0086_analytic |       |                        |                          |         |         |      |
| 8                                                                                       | gt3l_ | 68.624851<br>68.633176 | -48.996200<br>-48.993466 | 738000  | 3172.79 | 3.52 |
| SkySat:<br>20190608_152016_ssc2d2_0089_analytic<br>20190608_152016_ssc2d2_0090_analytic |       |                        |                          |         |         |      |
| 9                                                                                       | gt3l  | 68.839747<br>68.843797 | -48.925694<br>-48.924355 | 1165500 | 2691.53 | 0.81 |
| SkySat:<br>20190608_152016_ssc2d2_0064_analytic<br>20190608_152016_ssc2d2_0065_analytic |       |                        |                          |         |         |      |
| 10                                                                                      | gt3r  | 68.659000<br>68.665508 | -48.987365<br>-48.985236 | 987300  | 2968.48 | 2.42 |
| SkySat:<br>20190608_152016_ssc2d2_0085_analytic<br>20190608_152016_ssc2d2_0086_analytic |       |                        |                          |         |         |      |
| 11                                                                                      | gt3r  | 68.625432<br>68.634258 | -48.998301<br>-48.995422 | 738000  | 3228.69 | 3.22 |
| SkySat:<br>20190608_152016_ssc2d2_0089_analytic<br>20190608_152016_ssc2d2_0090_analytic |       |                        |                          |         |         |      |
|                                                                                         |       |                        |                          |         |         |      |
| <b>RGT 1169 June 13<sup>th</sup>, 2019</b>                                              |       |                        |                          |         |         |      |
| Landsat: LC08 L1TP 008011 20190608 20190619 01 T1                                       |       |                        |                          |         |         |      |



|                                                         |      |                        |                          |         |         |      |
|---------------------------------------------------------|------|------------------------|--------------------------|---------|---------|------|
| 1                                                       | gt1l | 69.284828<br>69.286312 | -49.389595<br>-49.389018 | 158400  | 2885.59 | 1.64 |
| Sentinel: T22WEB_20190619T152911                        |      |                        |                          |         |         |      |
| 2                                                       | gt1l | 69.274398<br>69.277766 | -49.393229<br>-49.391994 | 513200  | 2455.54 | 2.58 |
| Sentinel: T22WEB_20190619T152911                        |      |                        |                          |         |         |      |
| 3                                                       | gt1l | 69.352096<br>69.357914 | -49.366099<br>-49.363984 | 224100  | 2396.62 | 1.33 |
| Sentinel: T22WEB_20190619T152911 T22WEC_20190616T151911 |      |                        |                          |         |         |      |
| 4                                                       | gt1l | 69.498031<br>69.500010 | -49.314688<br>-49.313908 | 478100  | 3307.89 | 1.50 |
| Sentinel: T22WEC_20190616T151911                        |      |                        |                          |         |         |      |
| 5                                                       | gt1l | 69.543649<br>69.545104 | -49.298510<br>-49.297920 | 904600  | 2817.40 | 4.39 |
| Sentinel: T22WEC_20190616T151911                        |      |                        |                          |         |         |      |
| 6                                                       | gt1r | 69.759632<br>69.769272 | -49.223378<br>-49.219881 | 904600  | 2720.19 | 5.28 |
| Sentinel: T22WEC_20190616T151911                        |      |                        |                          |         |         |      |
| 7 Lake Cecily                                           | gt3r | 69.432711<br>69.437927 | -49.506539<br>-49.504628 | 1113500 | 3698.78 | 2.40 |
| Sentinel: T22WEC_20190616T151911                        |      |                        |                          |         |         |      |
| SkySat: 20190614_003736_ssc1d1_0070_analytic            |      |                        |                          |         |         |      |
| 8 Lake Cecily                                           | gt3l | 69.433379<br>69.437723 | -49.503956<br>-49.502329 | 1113500 | 2401.77 | 1.34 |
| Sentinel: T22WEC_20190616T151911                        |      |                        |                          |         |         |      |
| SkySat: 20190614_003736_ssc1d1_0070_analytic            |      |                        |                          |         |         |      |
| 9                                                       | gt3l | 69.811377<br>69.824516 | -49.371724<br>-49.367008 | 1113500 | 2612.26 | 1.63 |
| Sentinel: T22WEC_20190616T151911                        |      |                        |                          |         |         |      |

| <b>RGT 1222 June 17<sup>th</sup>, 2019</b>                                                                                                                                                                      |      |                        |                          |         |         |       |
|-----------------------------------------------------------------------------------------------------------------------------------------------------------------------------------------------------------------|------|------------------------|--------------------------|---------|---------|-------|
| Landsat: LC08_L1TP_007012_20190617_20190620_01_T1                                                                                                                                                               |      |                        |                          |         |         |       |
| 1                                                                                                                                                                                                               | gt1l | 68.456170<br>68.464562 | -48.939912<br>-48.937145 | 2060100 | 3134.91 | 3.62  |
| 2                                                                                                                                                                                                               | gt1l | 68.620541<br>68.643170 | -48.999022<br>-48.991496 | 48600   | 2618.15 | 1.70  |
| 3                                                                                                                                                                                                               | gt1l | 68.704751<br>68.719064 | -49.024388<br>-49.019587 | 1635300 | 4089.09 | 8.93  |
| 4                                                                                                                                                                                                               | gt1l | 68.811525<br>68.814417 | -49.056461<br>-49.055466 | 255600  | 2718.01 | 1.23  |
| 5                                                                                                                                                                                                               | gt1r | 68.620741<br>68.641831 | -48.996396<br>-48.989386 | 1635300 | 4129.21 | 10.62 |
| 6                                                                                                                                                                                                               | gt1r | 68.705881<br>68.713877 | -49.020457<br>-49.017786 | 1692900 | 2679.53 | 1.50  |
| 7                                                                                                                                                                                                               | gt1r | 68.810934<br>68.814324 | -49.054218<br>-49.053076 | 2225700 | 3181.78 | 3.89  |
| 8                                                                                                                                                                                                               | gt2l | 68.427765<br>68.444251 | -48.853795<br>-48.848446 | 1611900 | 4443.29 | 11.43 |
| 9                                                                                                                                                                                                               | gt2l | 68.808374<br>68.812653 | -48.975070<br>-48.973635 | 998574  | 2541.70 | 2.14  |
| 10                                                                                                                                                                                                              | gt2r | 68.428276<br>68.445114 | -48.851875<br>-48.846413 | 998574  | 2802.32 | 1.70  |
| 11                                                                                                                                                                                                              | gt2r | 68.523066<br>68.526979 | -48.878531<br>-48.877251 | 1025100 | 3193.46 | 2.86  |
| SkySat:<br>20190616_144210_ssc4d2_0122_analytic<br>20190616_144210_ssc4d2_0123_analytic<br>20190616_144210_ssc4d2_0124_analytic<br>20190617_152915_ssc1d2_0122_analytic<br>20190617_152915_ssc1d2_0123_analytic |      |                        |                          |         |         |       |
| 12                                                                                                                                                                                                              | gt3l | 68.443954<br>68.463598 | -48.780603<br>-48.774288 | 1611900 | 4210.25 | 11.55 |
| 13                                                                                                                                                                                                              | gt3l | 68.621338<br>68.624034 | -48.832513<br>-48.831615 | 1025100 | 3860.27 | 1.59  |

|                                                                                         |      |                        |                          |         |         |       |
|-----------------------------------------------------------------------------------------|------|------------------------|--------------------------|---------|---------|-------|
| 14 Lake Zadié                                                                           | gt3l | 68.731742<br>68.736769 | -48.869345<br>-48.867678 | 4101300 | 4774.88 | 11.49 |
| SkySat:<br>20190616_144210_ssc4d3_0092_analytic<br>20190616_144210_ssc4d3_0093_analytic |      |                        |                          |         |         |       |
| 15                                                                                      | gt3l | 68.837005<br>68.845532 | -48.905172<br>-48.902345 | 2060100 | 3842.27 | 3.08  |
| 16                                                                                      | gt3r | 68.445097<br>68.462664 | -48.778073<br>-48.772433 | 998574  | 2562.81 | 0.35  |
| 17                                                                                      | gt3r | 68.835768<br>68.850254 | -48.904473<br>-48.899674 | 4101300 | 4602.40 | 10.64 |
| 18                                                                                      | gt3l | 69.614426<br>69.630295 | -49.172278<br>-49.166720 | 5656500 | 4005.92 | 6.13  |
| Landsat: LC08_L1TP_008011_20190608_20190619_01_T1                                       |      |                        |                          |         |         |       |
| Sentinel: T22WEC_20190616T151911                                                        |      |                        |                          |         |         |       |
| 19                                                                                      | gt3l | 69.645719<br>69.651690 | -49.179791<br>-49.177687 | 2982600 | 2899.97 | 1.70  |
| Landsat: LC08_L1TP_008011_20190608_20190619_01_T1                                       |      |                        |                          |         |         |       |
| Sentinel: T22WEC_20190616T151911                                                        |      |                        |                          |         |         |       |

*Table S1: Lakes used in this study noting Lake number, ICESat-2 details (RGT/ground track/spot), maximum latitude and longitude boundaries for the lake, maximum surface area of the lake detected from imagery and the length of the ICESat-2 pass over the lake. Concurrent imagery sources with unique identifiers are shown below each lake (with imagery associated with the full RGT noted below each RGT/date designation).. Lake numbers correspond to profiles shown in Supplemental Figure 3.*

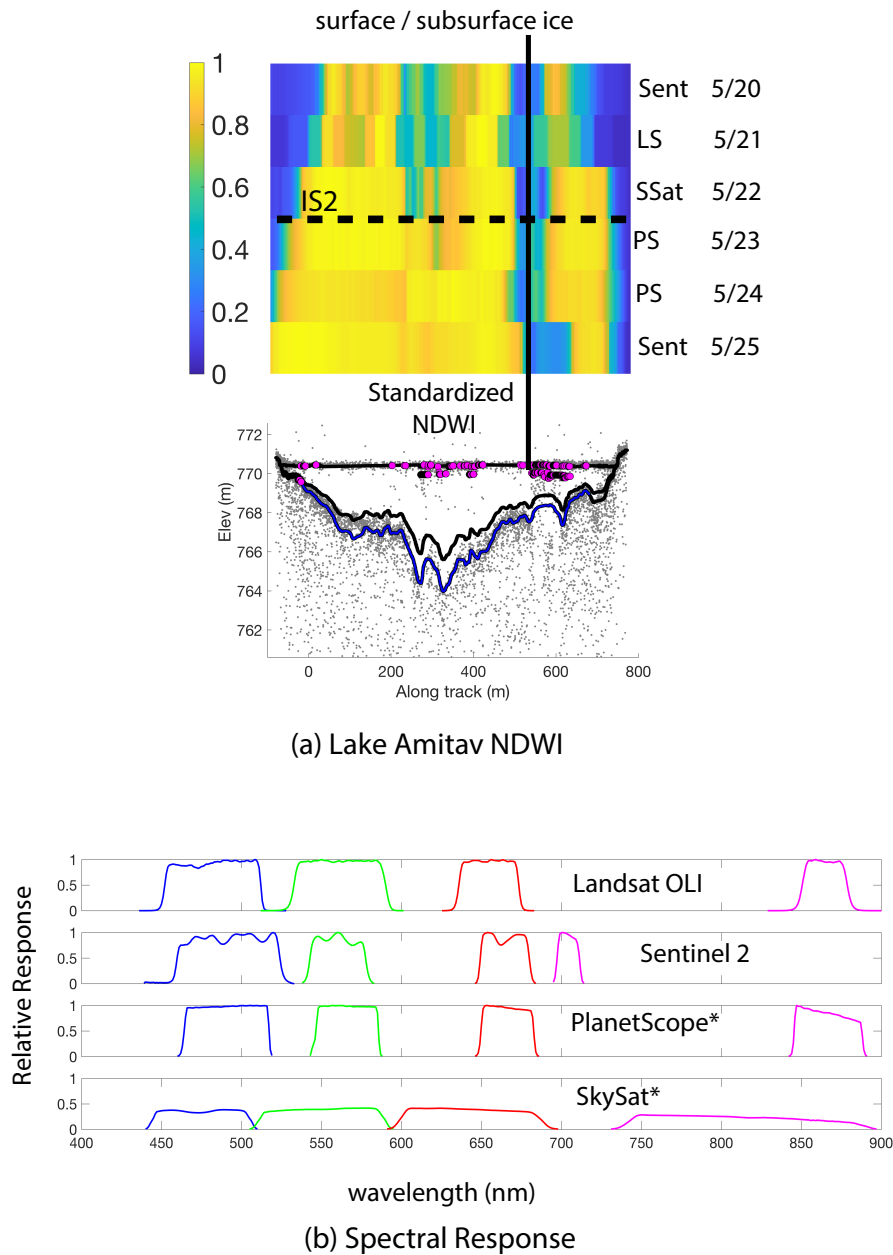

Figure S1: (a) Watta calculated profile of depth, depth corrected for refraction and subsurface ice over Lake Amitav (bottom) with NDWI values co-registered to the ICESat-2 track (top) (b) Spectral Response curve for imagery sources used in main text. Note that PlanetScope and SkySat data are shown for the satellite used in imagery collected over Lake Amitav and are not representative of the entire constellation. Landsat OLI source (Barsi et al., 2014)., Sentinel-2 source (<https://earth.esa.int/web/sentinel/user-guides/sentinel-2-msi>), Planet Labs SkySat and PlanetScope (see: support.planet.com)

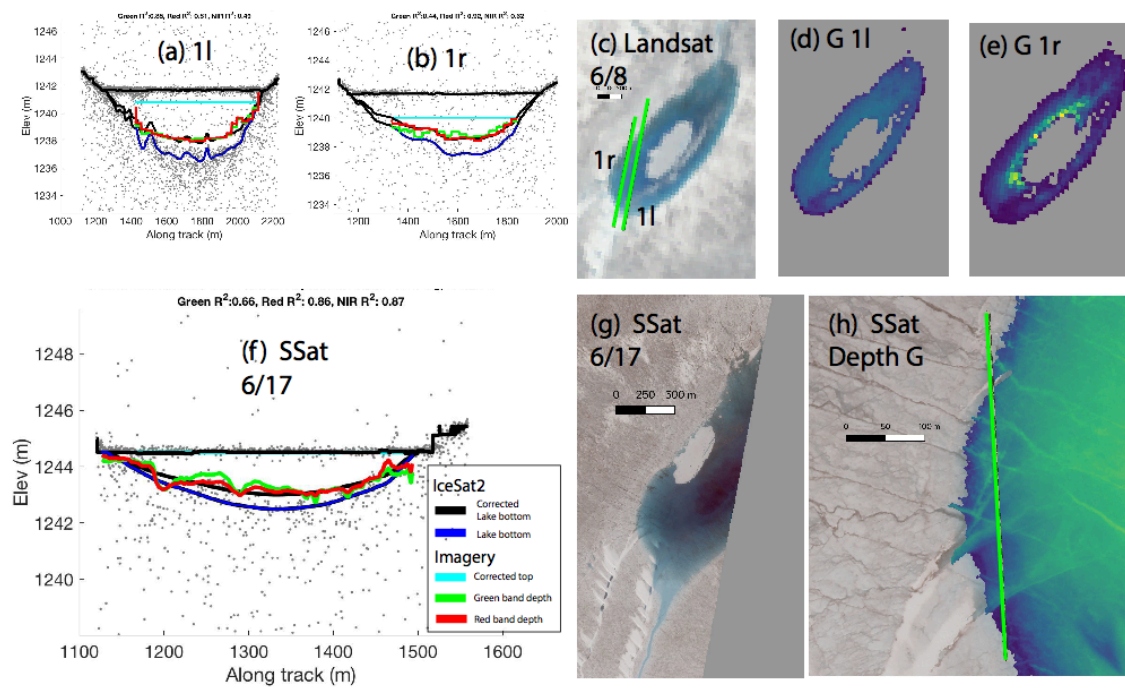

Figure S2: Watta-calculated depth, corrected depth and lake surface profiles for (top) RGT 1108 Lake 1 on June 9<sup>th</sup>, 2019, with gt1l (a,d) and gt1r (b,e). Landsat imagery collected on June 8<sup>th</sup>, 2019. (bottom) The same lake, also RGT 1222 Lake 6 on June 17<sup>th</sup>, 2019 (f-h), with SkySat imagery collected on June 17<sup>th</sup>, 2019.

**Figure: S3. Lake Depth Profiles (corresponding to Table S1)**

**RGT 727**

**May 15<sup>th</sup>, 2019**

**Lake 1:**

Sentinel-2: May 12<sup>th</sup>, 2019

Sentinel-2: May 14<sup>th</sup>, 2019

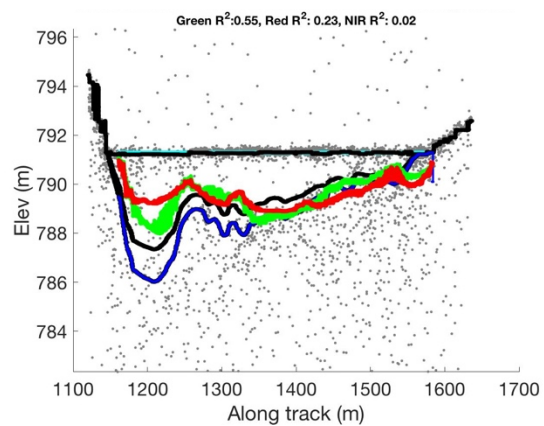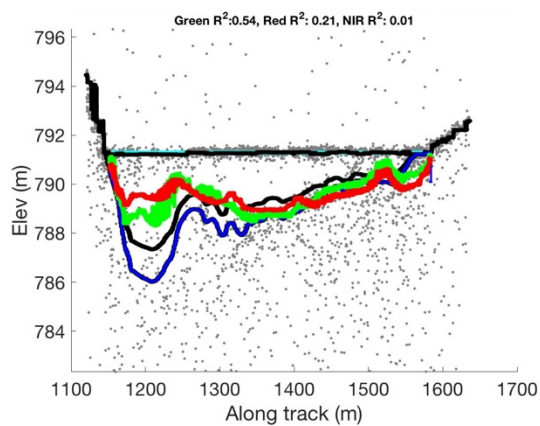

IceSat2

- Corrected
- Lake bottom
- Lake bottom

Imagery

- Corrected top
- Green band depth
- Red band depth

## Lake 1

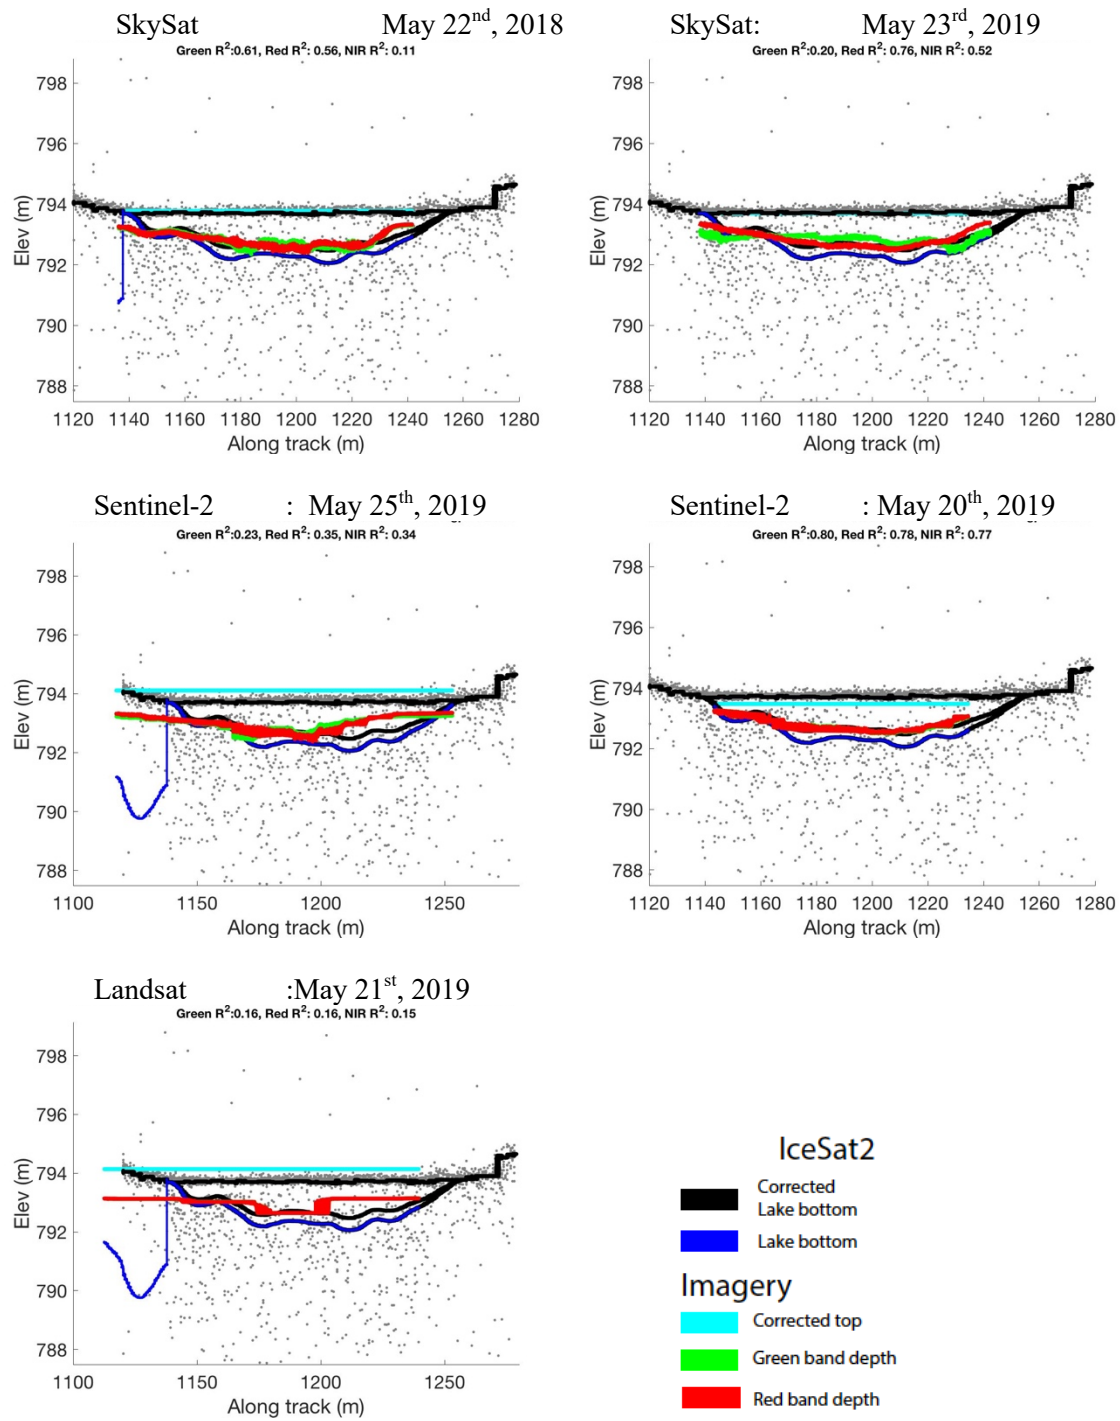

## Lake 2:

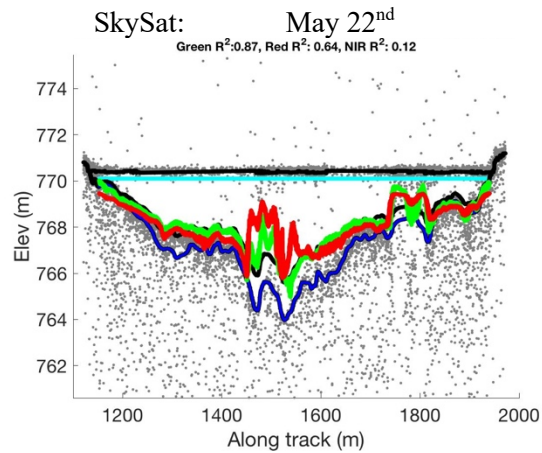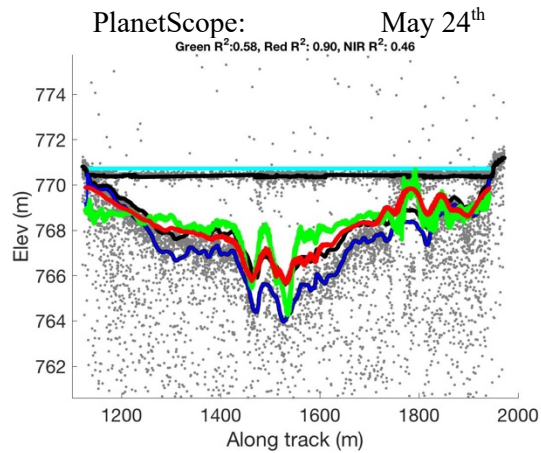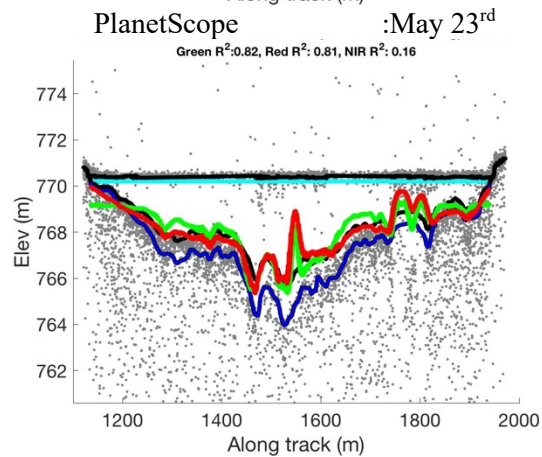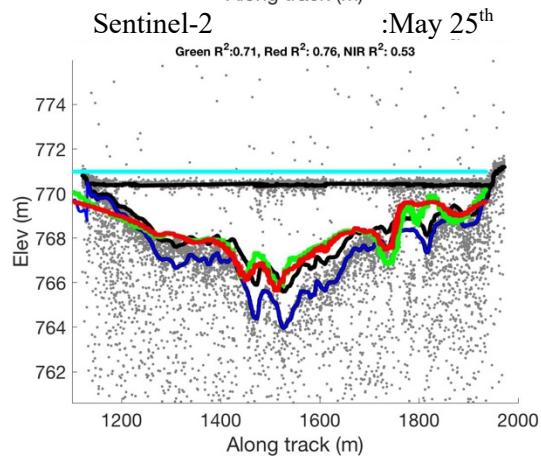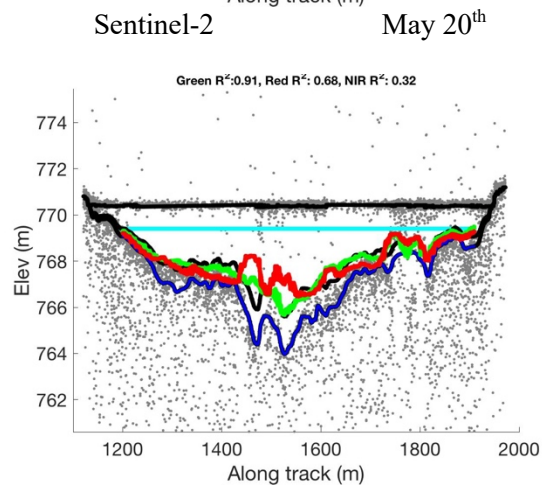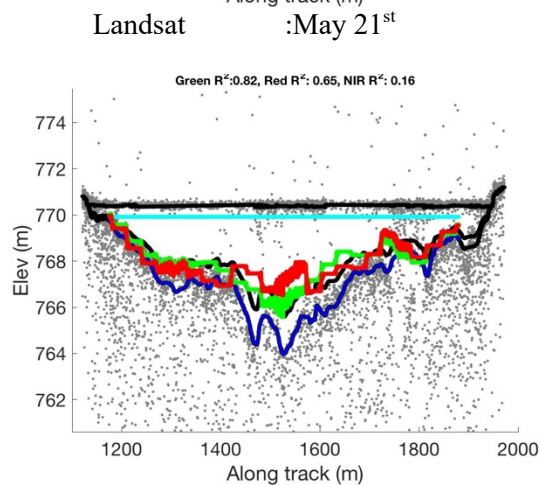



## Lake 3:

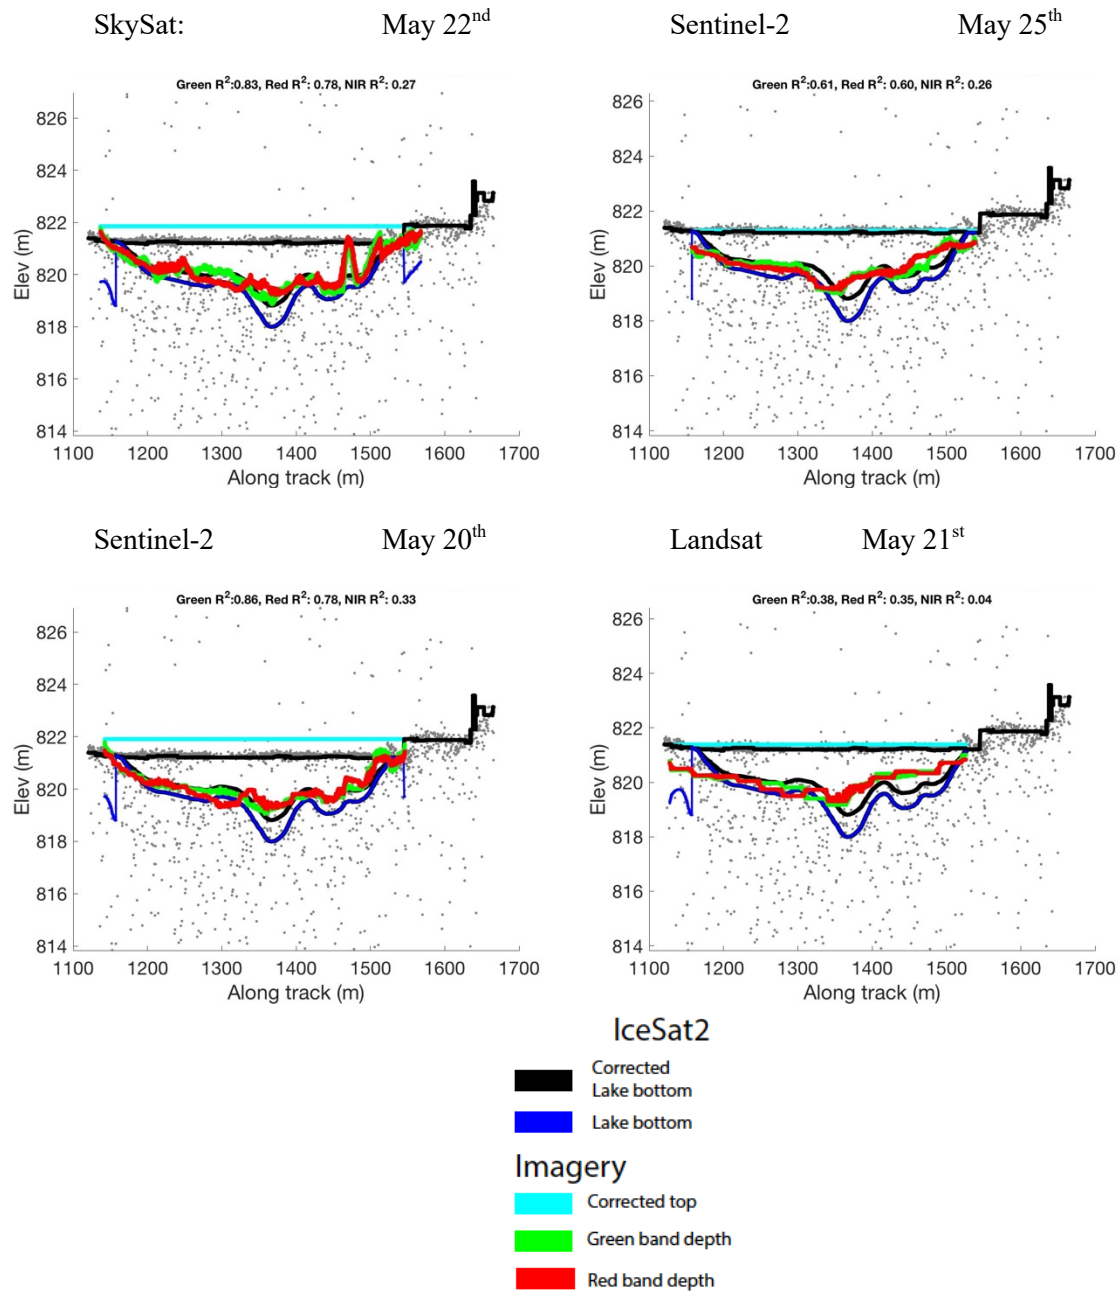

## Lake 4:

SkySat

May 22<sup>nd</sup>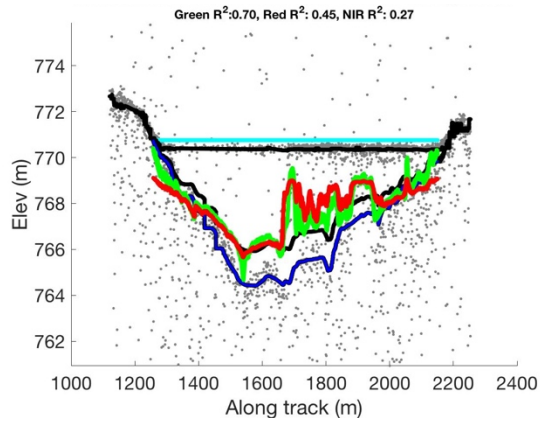

PlanetScope

May 24<sup>th</sup>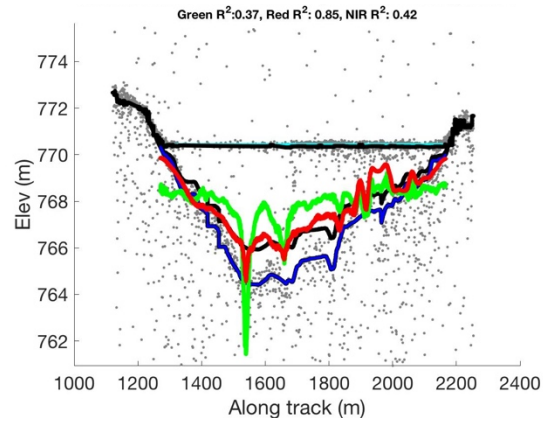

PlanetScope

May 23<sup>rd</sup>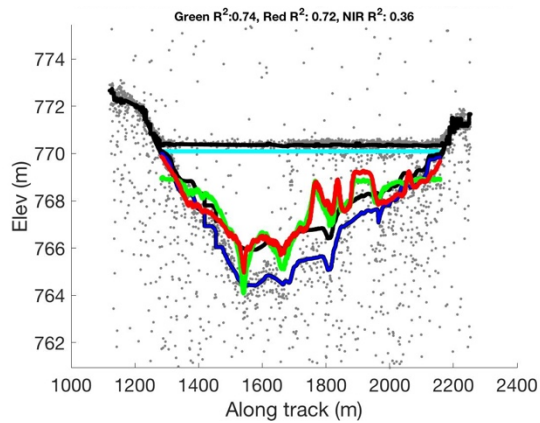

Sentinel-2

May 25<sup>th</sup>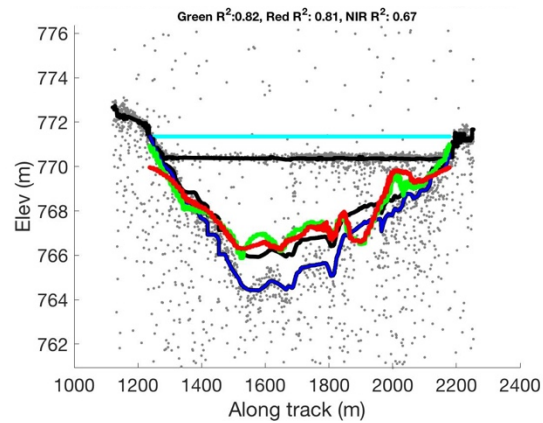

s

Sentinel-2

May 20<sup>th</sup>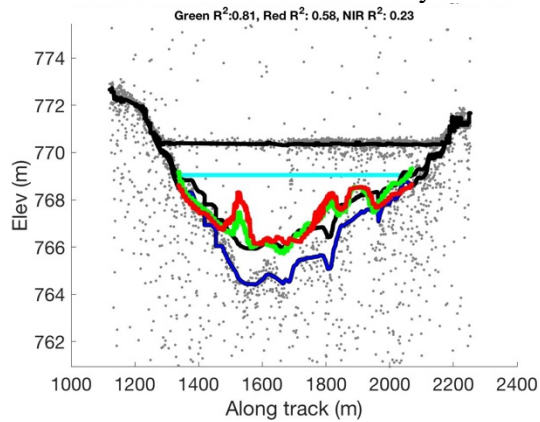

Landsat

May 21<sup>st</sup>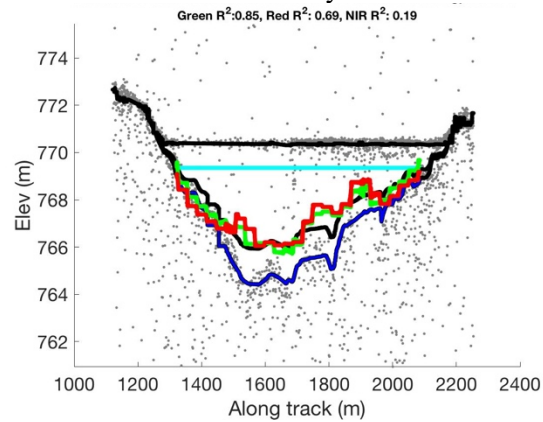

## Lake 5:

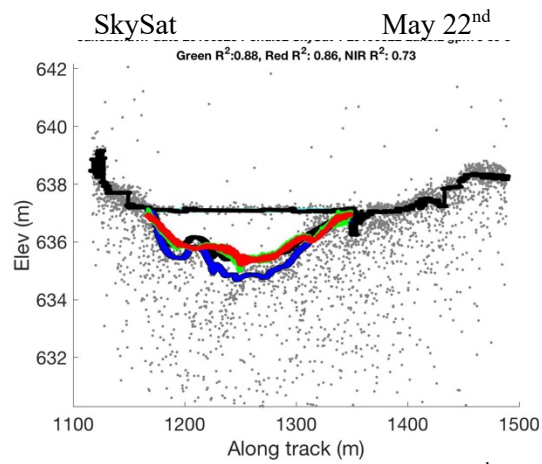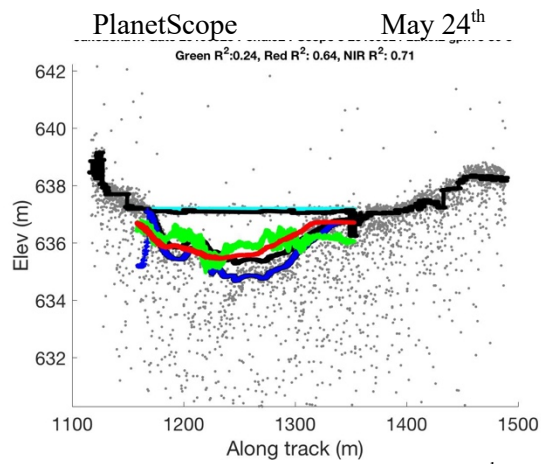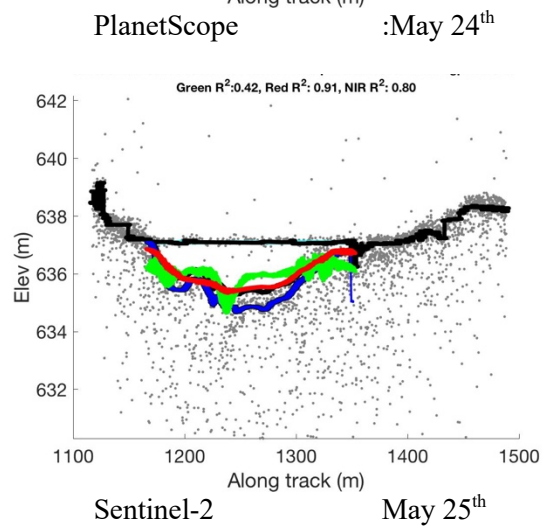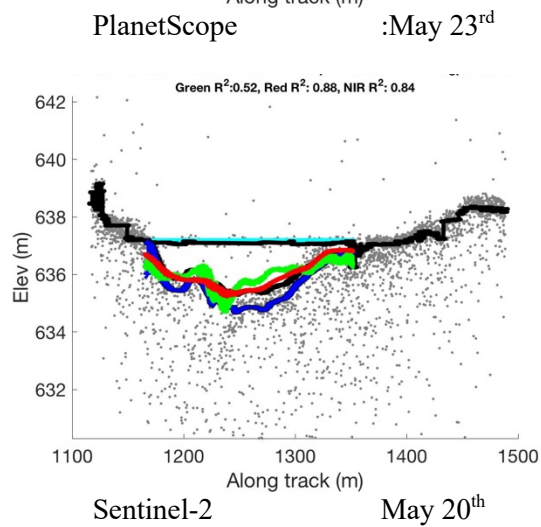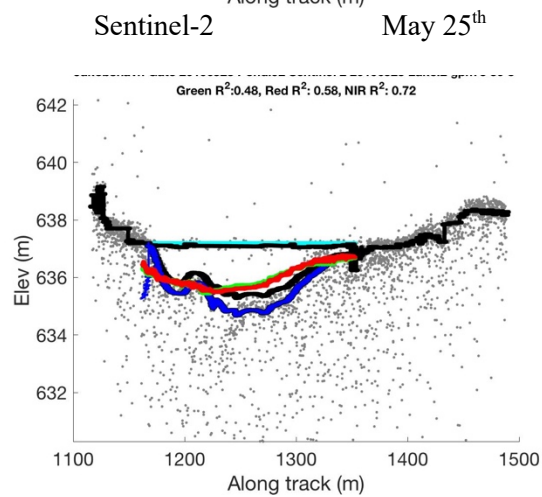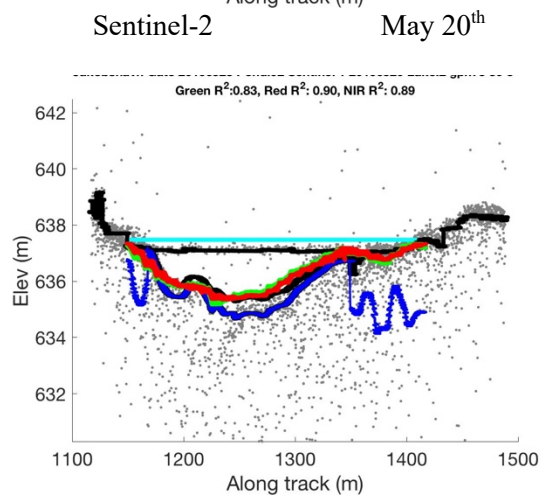

## Lake 5 cont...

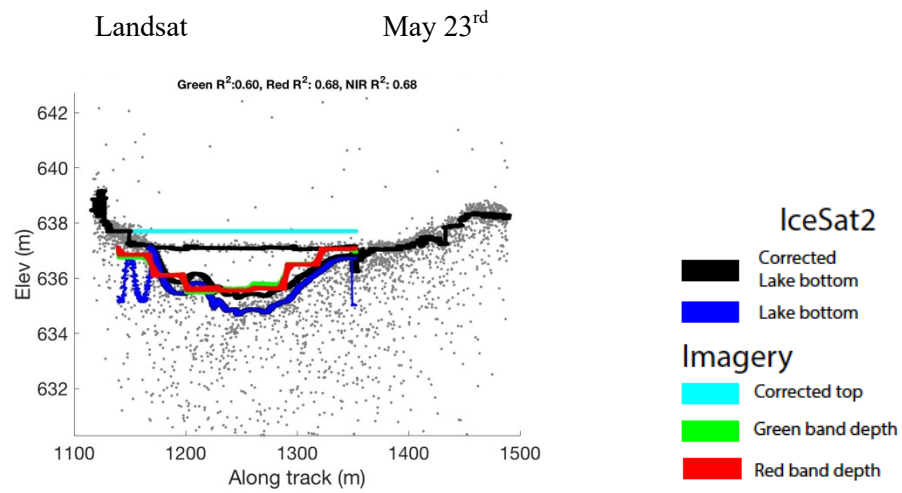

## Lake 1

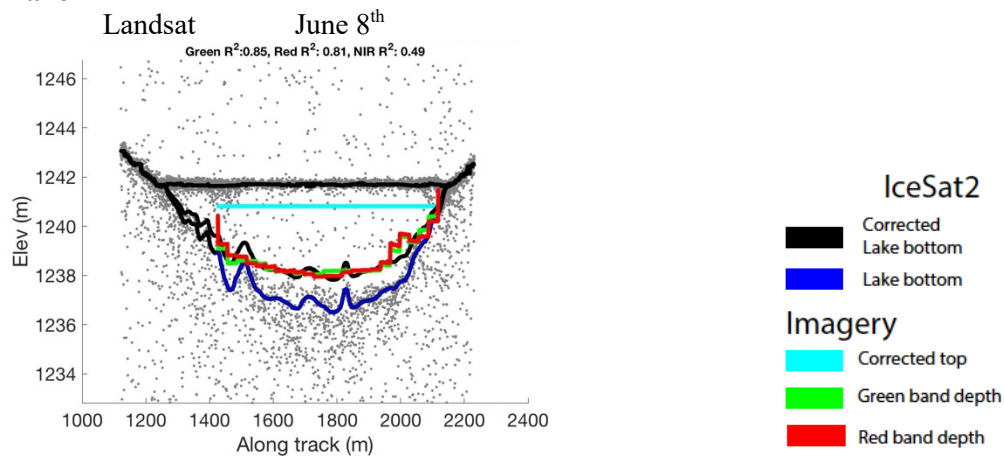

## Lake 2:

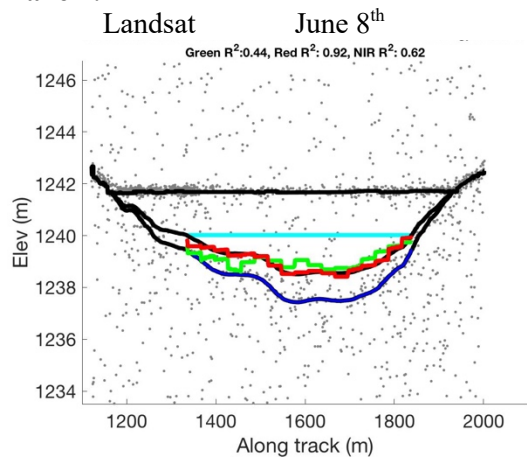

## Lake 3:

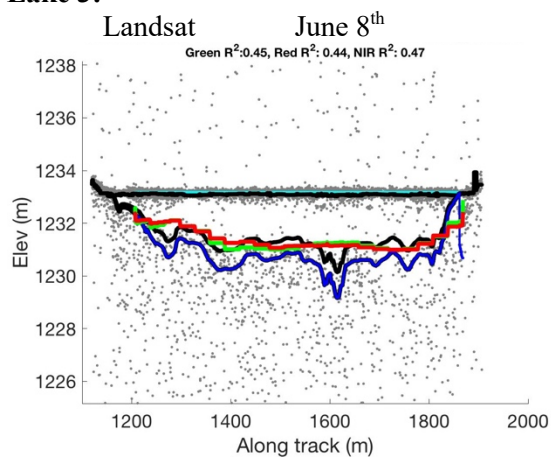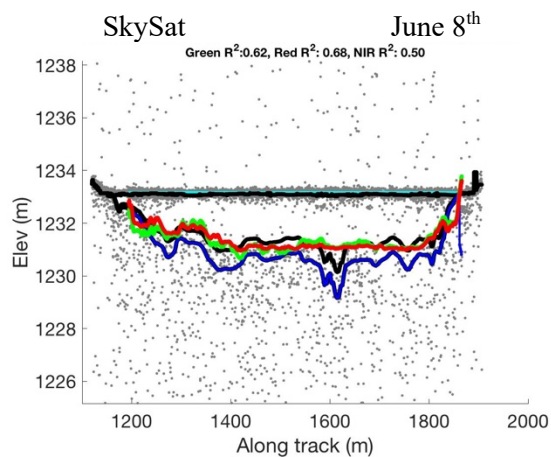

## Lake 4

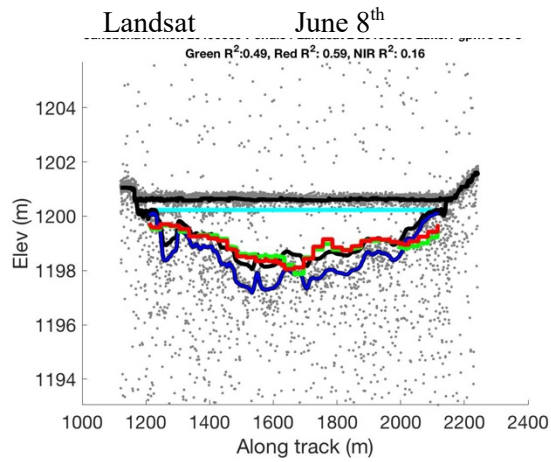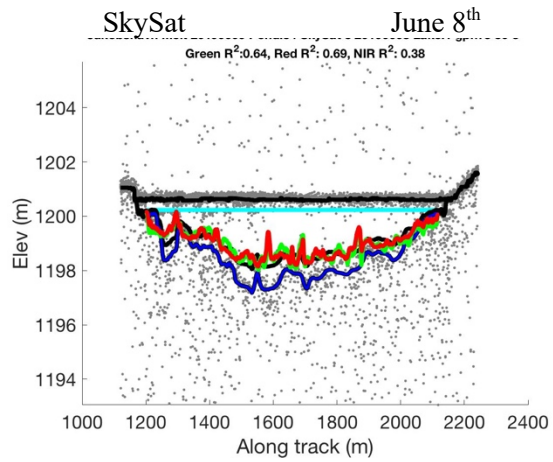

## Lake 5

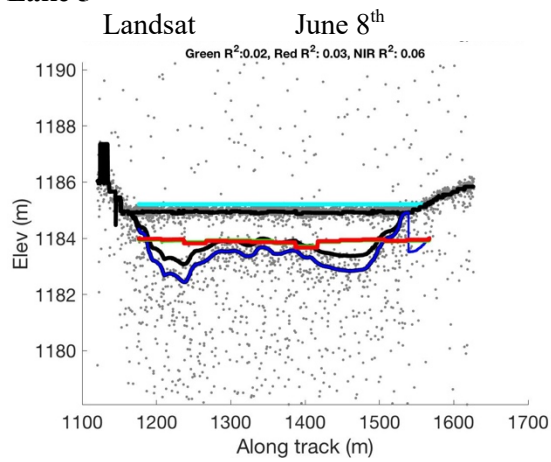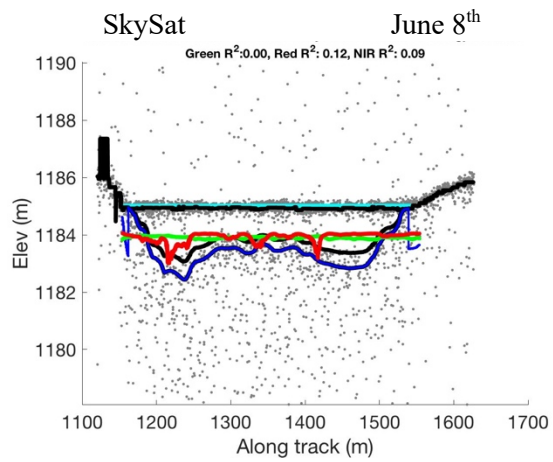

## Lake 6

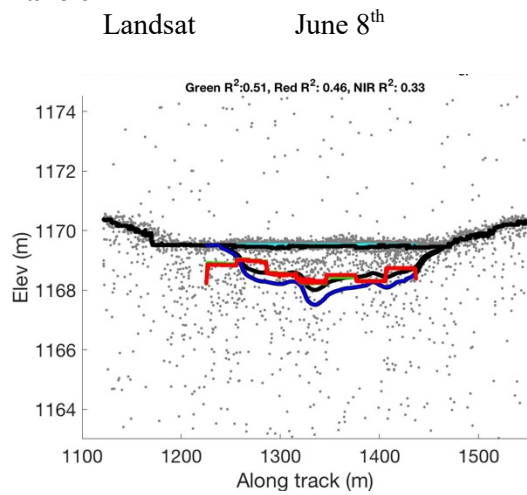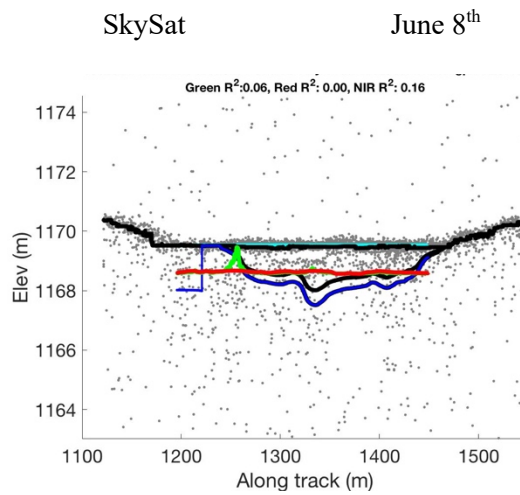



## Lake 7

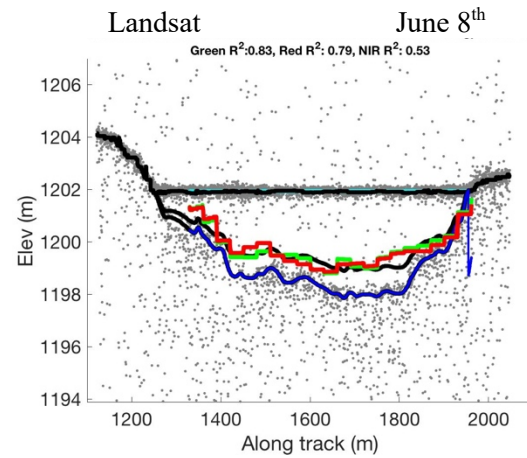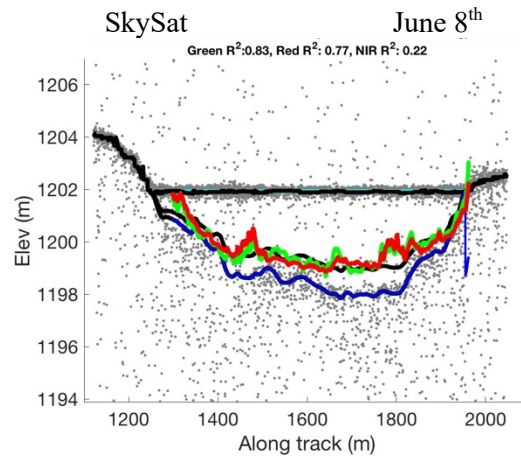

## Lake 8

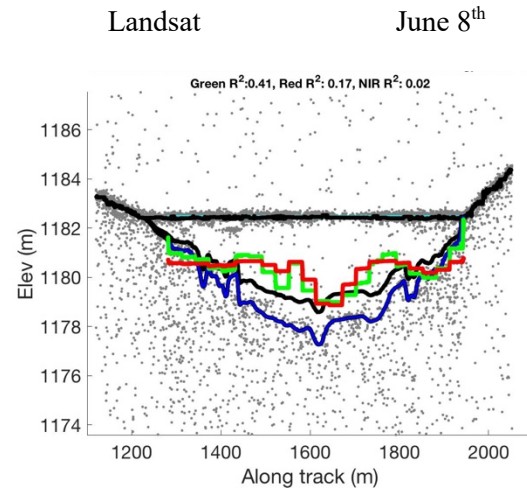

## Lake 9

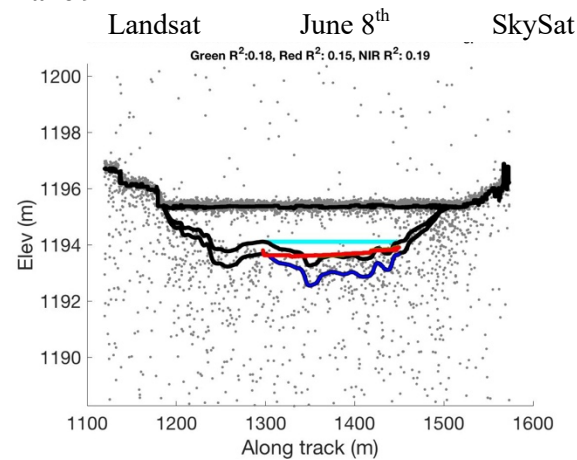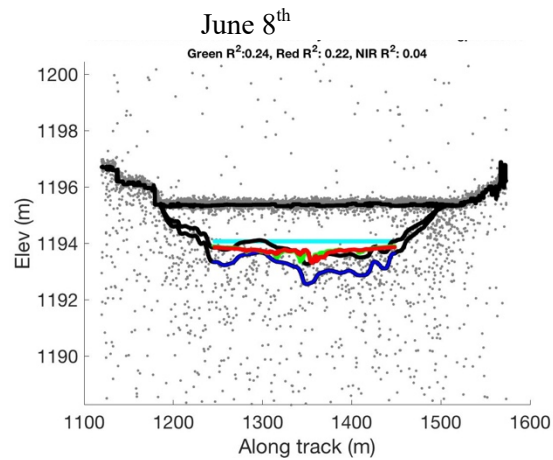

## Lake 10

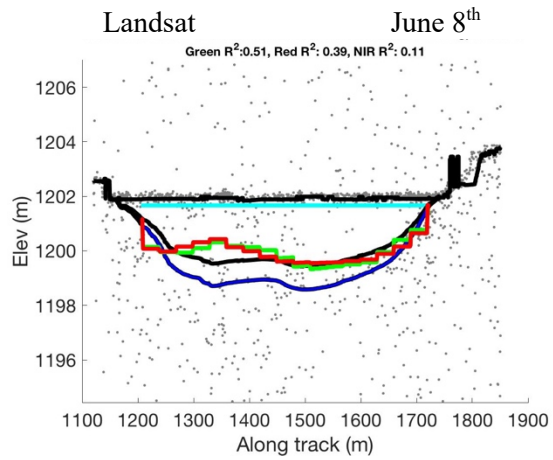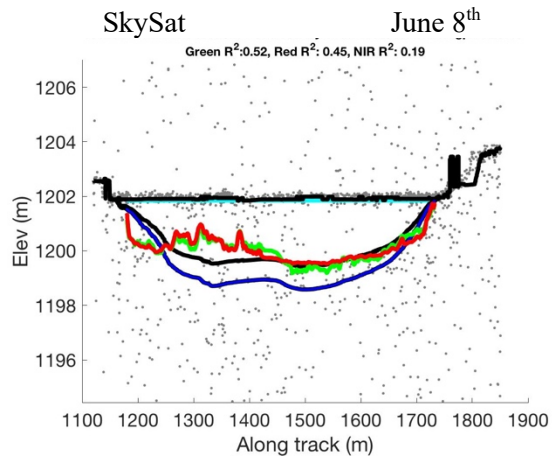

## Lake 11

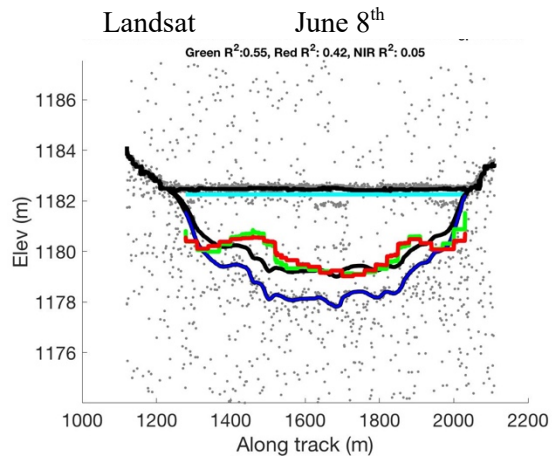



**Lake 1**

Landsat

June 8<sup>th</sup>

Sentinel-2

June 16<sup>th</sup>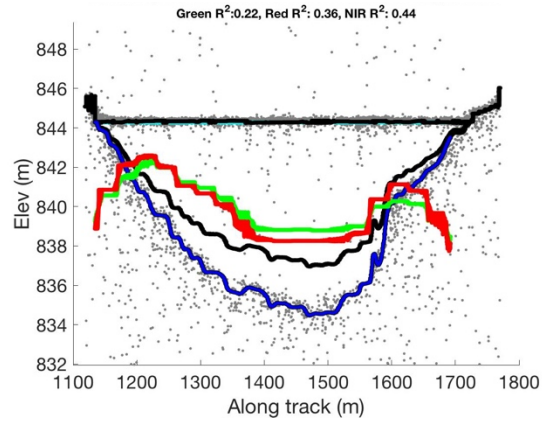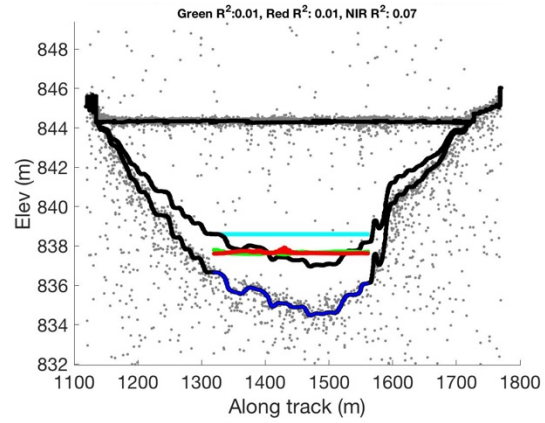**Lake 2**

Sentinel-2

June 16<sup>th</sup>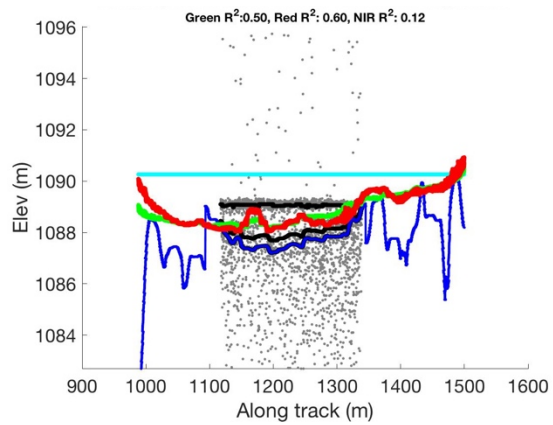

**Lake 3**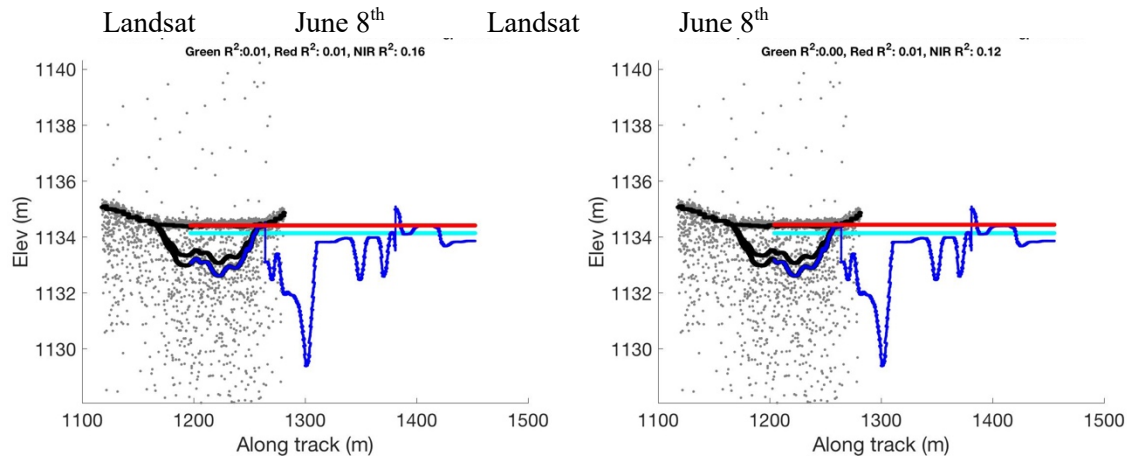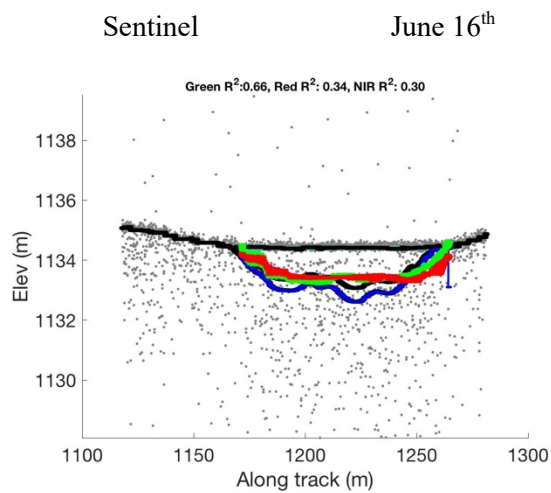**Lake 4**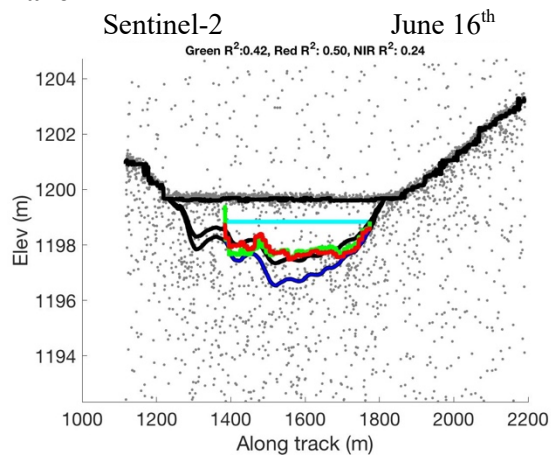

## Lake 5

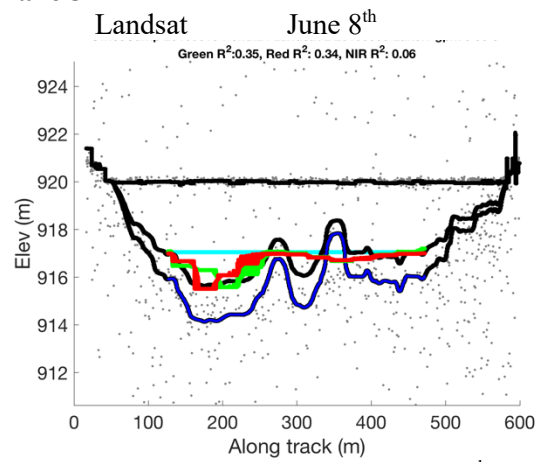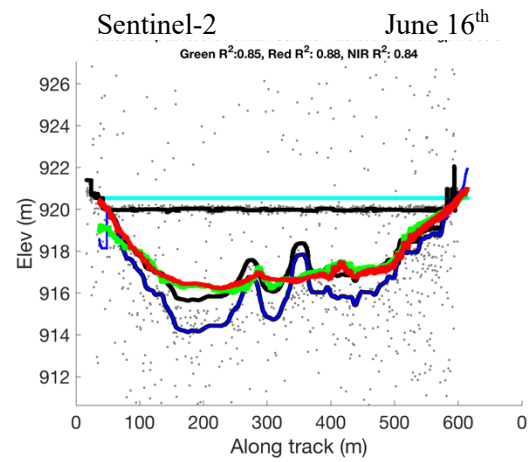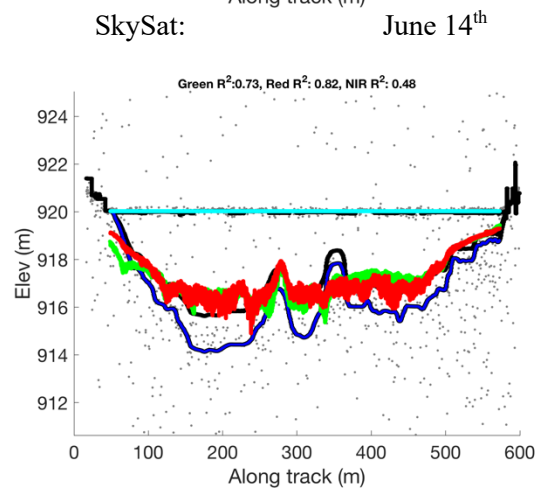

## Lake 6

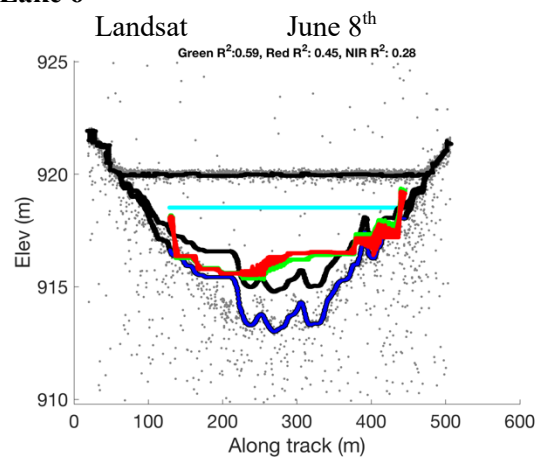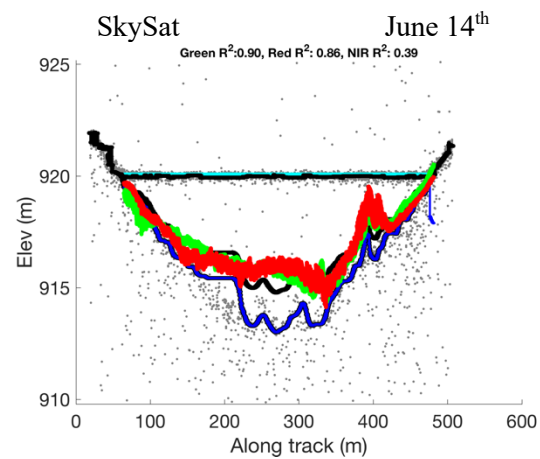

## Lake 6 cont...

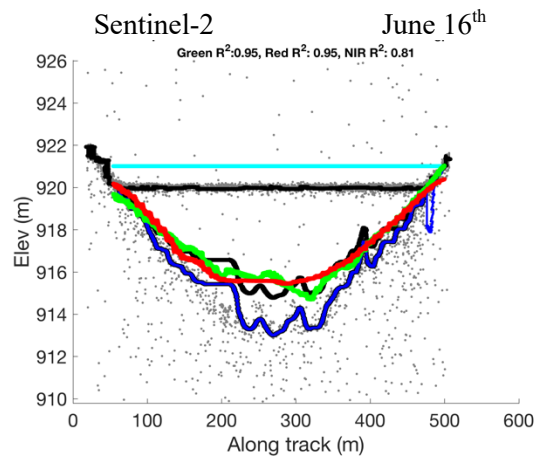

## Lake 7

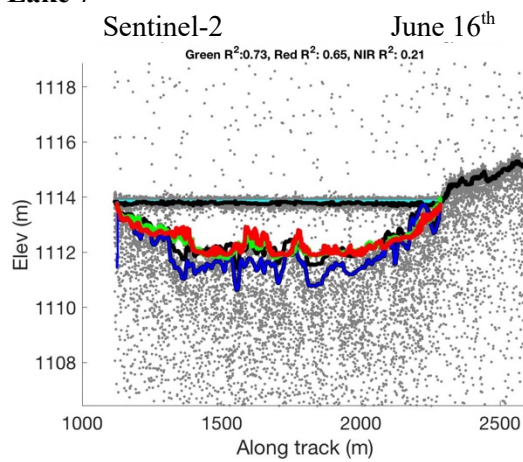

## Lake 8

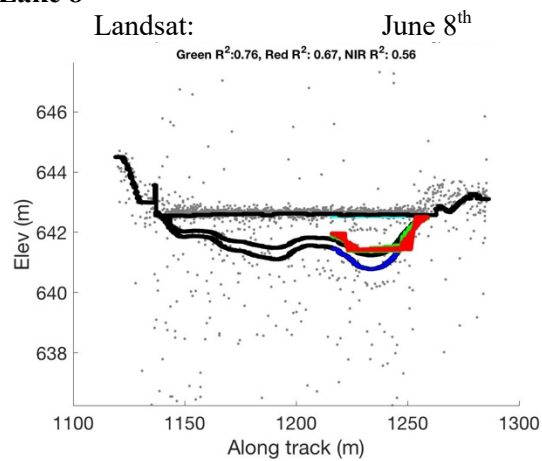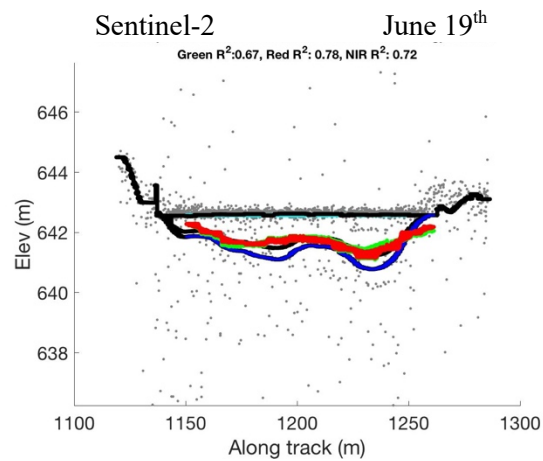

## Lake 9

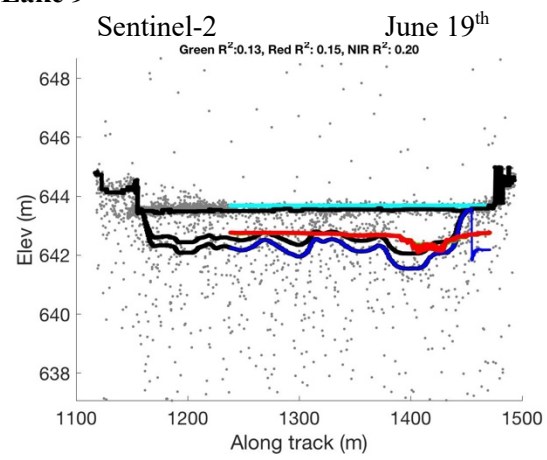

**Lake 1**Landsat June 17<sup>th</sup>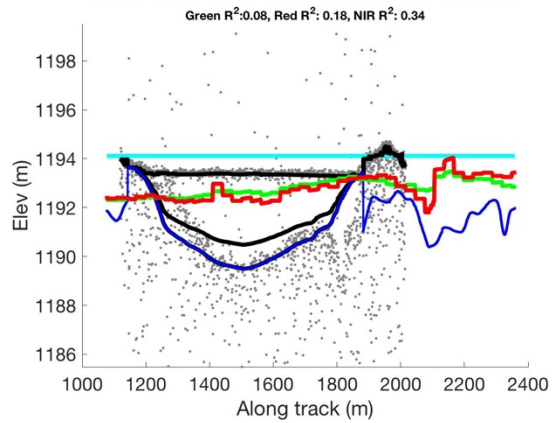**Lake 2**Landsat June 17<sup>th</sup>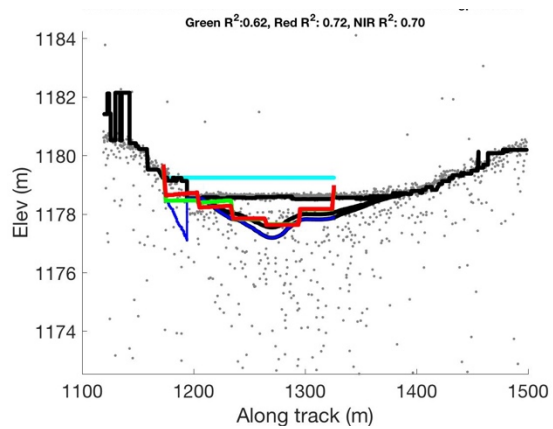**Lake 3**Landsat June 17<sup>th</sup>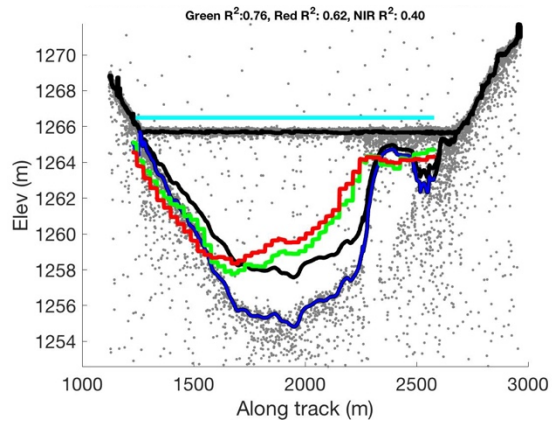

**Lake 4**

Landsat

June 17th

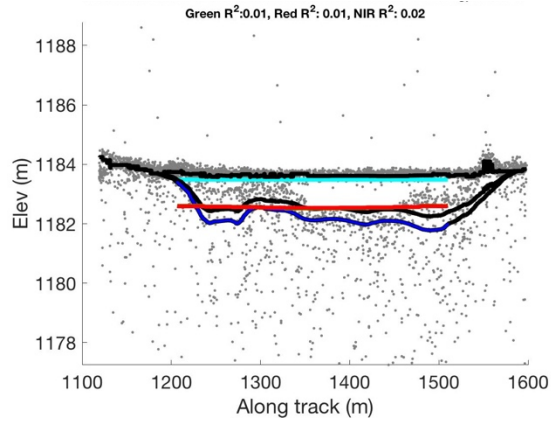**Lake 5:**

Landsat

June 17th

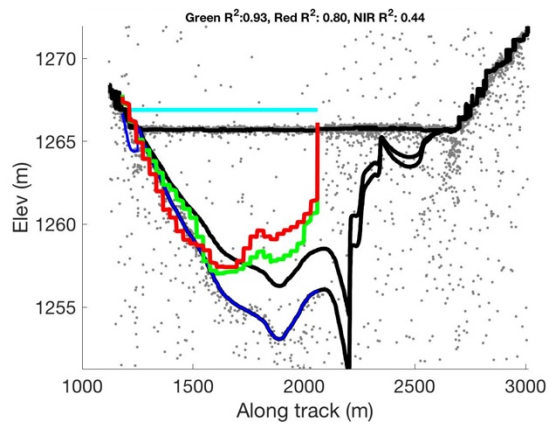**Lake 6**

Landsat

June 17<sup>th</sup>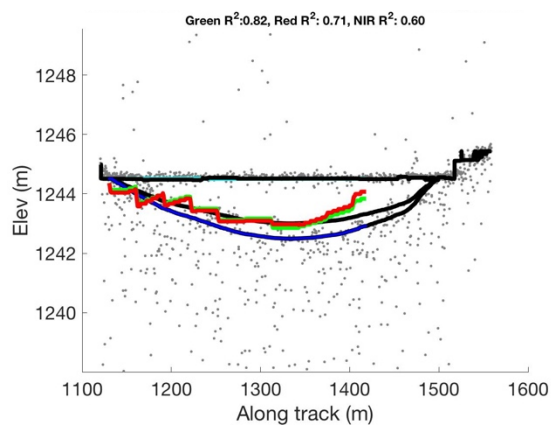

SkySat

June 17<sup>th</sup>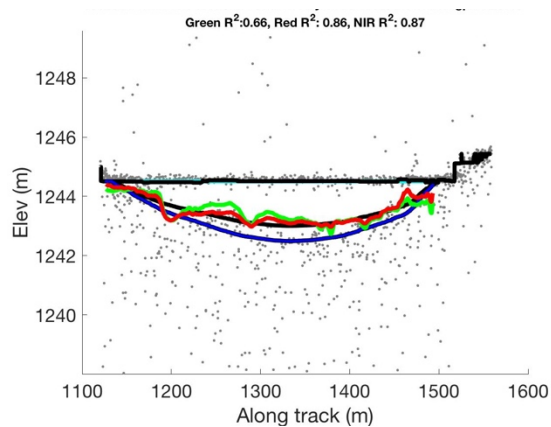

**Lake 7:**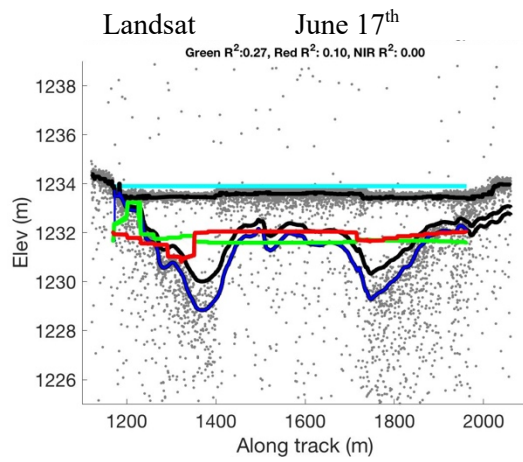**Lake 8:**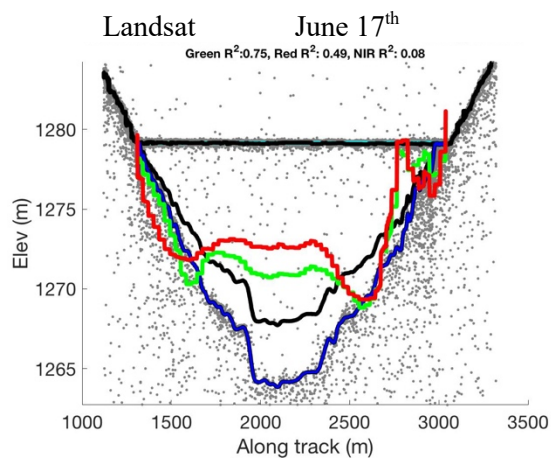**Lake 9:**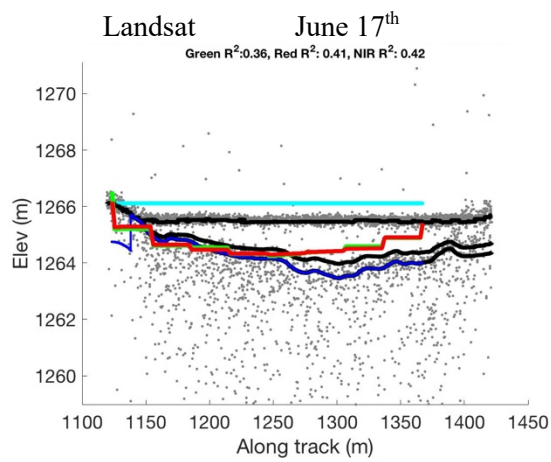



## Lake 10

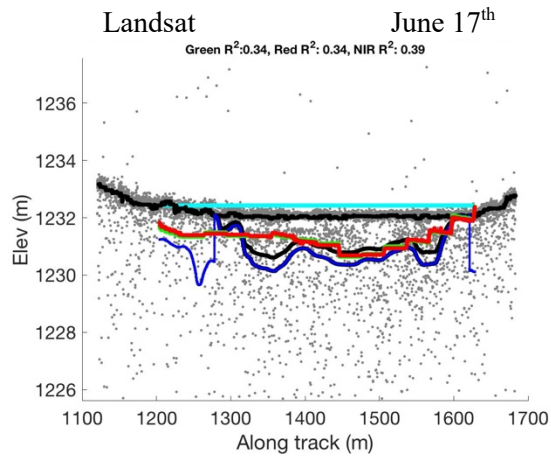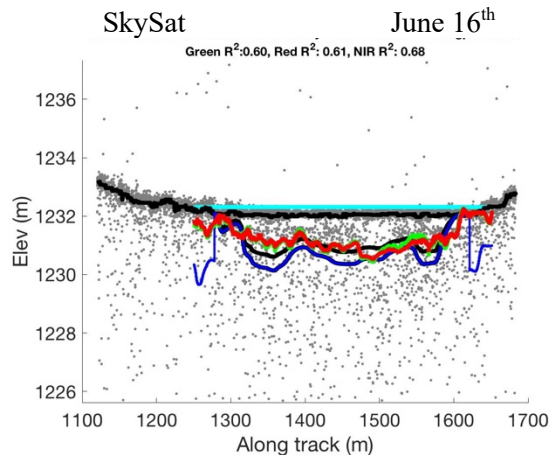

## Lake 11

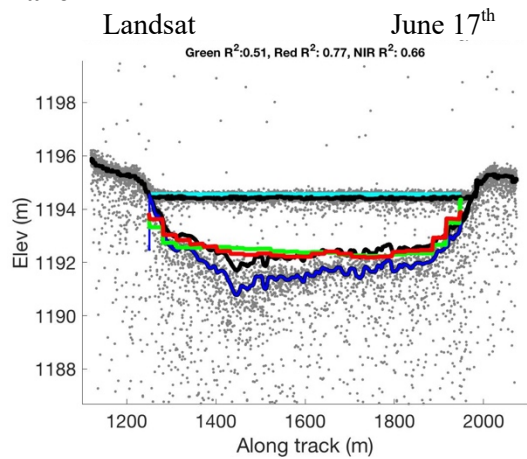

## Lake 12

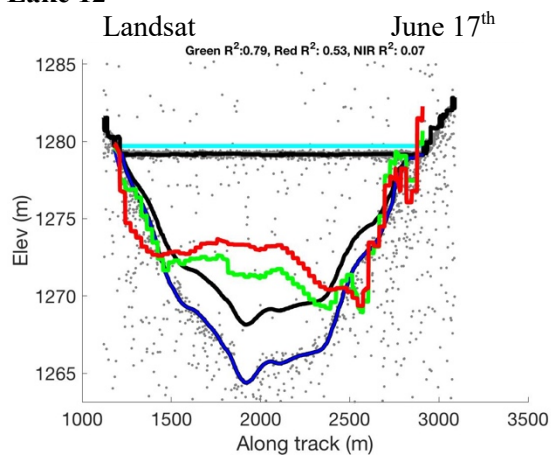

**Lake 13**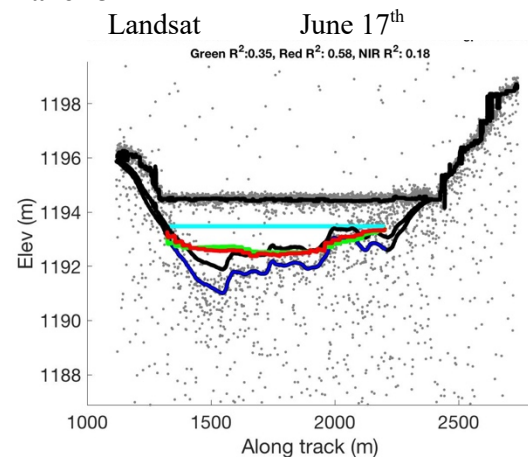**Lake 14**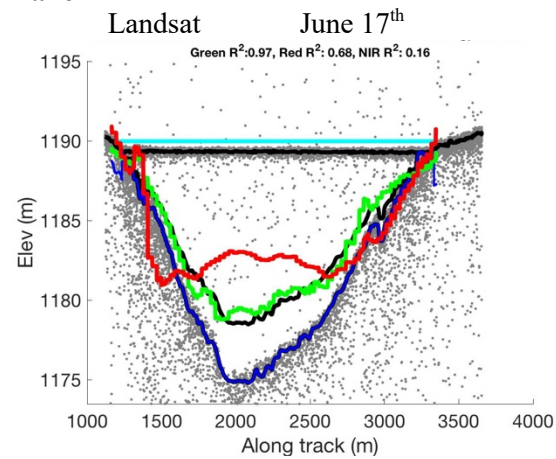**Lake 15**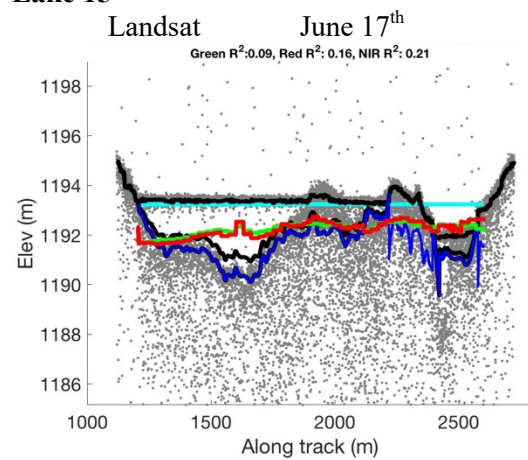

**Lake 16**Landsat June 17<sup>th</sup>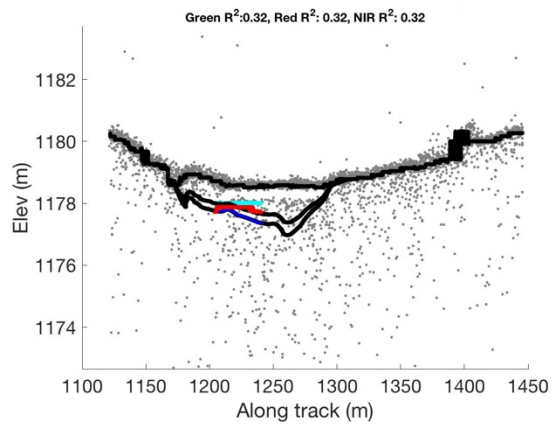**Lake 17**Landsat June 17<sup>th</sup>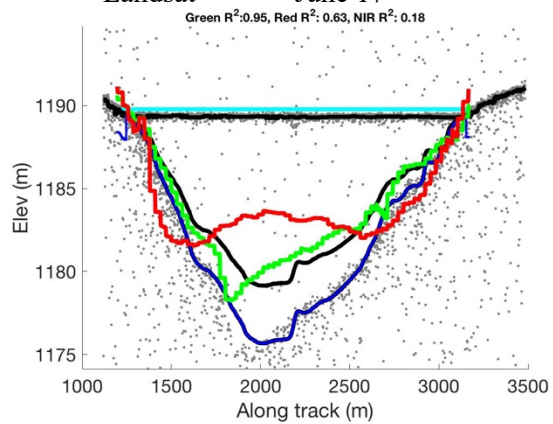**Lake 18**Sentinel-2 June 16<sup>th</sup>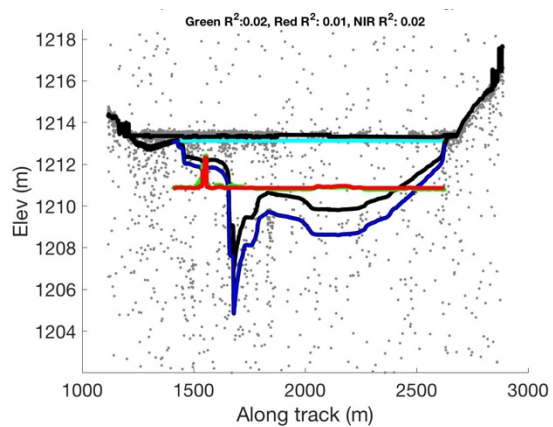

**Lake 19**

Sentinel-2

June 16<sup>th</sup>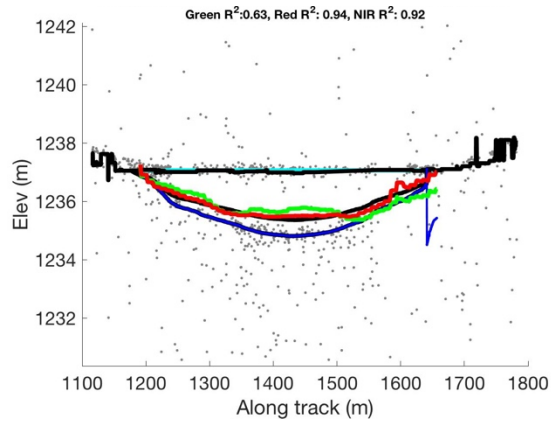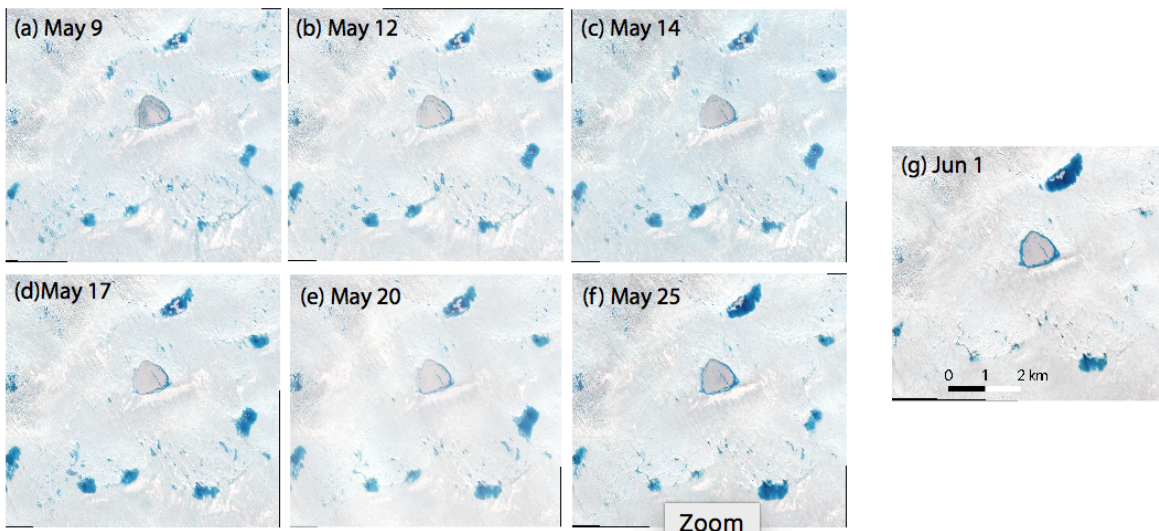

Figure S4: Lake evolution throughout the season in region of Western Greenland (see Fig. 1 in main) from Sentinel-2 imagery. Surface water extent (where  $NDWI_{ice} > 0.2$ ) remains consistent at 3%

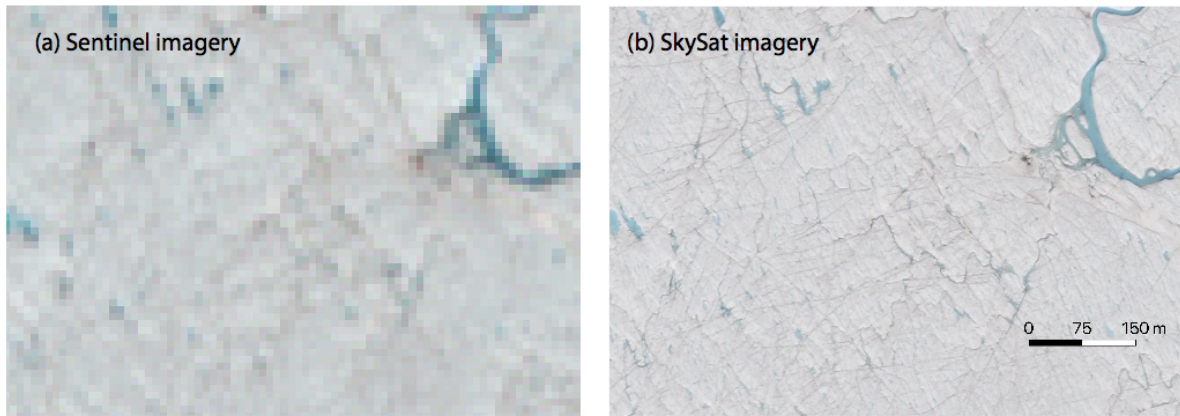

*Figure S5: Higher resolution imagery capturing small-scale stream features on June 1<sup>st</sup> in Western Greenland. (a): Sentinel-2 imagery (10m) (b): SkySat imagery*
